# Supplementary material for: Stability, Bifurcation and Chaos Analysis of Vector-Borne Disease Model with Application to Rift Valley Fever
Source: PubMed Central journal article supplement (PMC4182743; doi:10.1371/journal.pone.0108172), 2014-10-01
Supplement: pone.0108172.s001.pdf [file pone.0108172.s001.pdf]

# Stability, bifurcation and chaos analysis of vector-borne disease model with application to Rift Valley fever

Sansao A. Pedro, Shirley Abelman, Frank T. Ndjomatchoua, Rosemary Sang, Henri E.Z. Tonnang  
Methods S1: Supporting Information

## APPENDIX A

### A-1 Computation of the basic reproduction number

First, we calculate the basic reproduction number for the vertical transmission route,  $R_{0,V}$ . For this case, the only compartments involved are the infected eggs, exposed adults, and infectious adults of the *Aedes* population. Thus we have, in the notation of reference [1],

$$\frac{d}{dt} \begin{pmatrix} U_1 \\ E_1 \\ I_1 \end{pmatrix} = F_v - V_v = \begin{pmatrix} 0 \\ 0 \\ \theta_1 U_1 \end{pmatrix} - \begin{pmatrix} \theta_1 U_1 - b_1 q_1 I_1 \\ \gamma_1 E_1 + d_1 \frac{E_1 N_1}{K_1} \\ d_1 \frac{I_1 N_1}{K_1} - \gamma_1 E_1 \end{pmatrix} \quad (\text{A-1})$$

The corresponding Jacobian matrices at the disease free equilibrium of the above system are

$$F_v^0 = \begin{pmatrix} 0 & 0 & 0 \\ 0 & 0 & 0 \\ \theta_1 & 0 & 0 \end{pmatrix}, \quad V_v^0 = \begin{pmatrix} \theta_1 & 0 & -b_1 q_1 \\ 0 & \gamma_1 + \mu_1 & 0 \\ 0 & -\gamma_1 & \mu_1 \end{pmatrix} \quad (\text{A-2})$$

The basic reproduction number for the vertical transmission is calculated as the spectral radius of the next generation matrix,  $(F_v V_v^{-1})$

$$R_{0,V} = \frac{b_1 q_1}{\mu_1} = \frac{b_1 q_1 K_1}{d_1 N_1}.$$

Next, we calculate the horizontal transmission basic reproduction number,  $R_{0,H}$ . For this mode of transmission we must evaluate the exposed and infectious compartments of the *Aedes*, *Culex* and asymptomatic and infectious compartments of the livestock populations. To simplify the calculation of  $R_0$ , we transform our system to consider the percent of the population made up by each compartment,  $x_i = \frac{X_i}{N_i}$ , where  $X_i$  is a compartment of population  $i$ ,

$$\frac{d}{dt} \begin{pmatrix} e_1 \\ i_1 \\ a_2 \\ i_2 \\ e_3 \\ i_3 \end{pmatrix} = F_H - V_H = \begin{pmatrix} l_1 \beta_{12} i_2 N_2 (1 - e_1 - i_1) + l_1 \tilde{\beta}_{12} a_2 N_2 (1 - e_1 - i_1) \\ 0 \\ (1 - \theta_2) l_1 \beta_{21} i_1 N_1 (1 - a_2 - i_2 - r_2) + (1 - \theta_2) l_3 \beta_{23} i_3 N_3 (1 - a_2 - i_2 - r_2) \\ \theta_2 l_1 \beta_{21} i_1 N_1 (1 - a_2 - i_2 - r_2) + \theta_2 l_3 \beta_{23} i_3 N_3 (1 - a_2 - i_2 - r_2) \\ l_3 \beta_{32} i_2 N_2 (1 - e_3 - i_3) + l_3 \tilde{\beta}_{32} a_2 N_2 (1 - e_3 - i_3) \\ 0 \end{pmatrix} - \begin{pmatrix} (\gamma_1 + d_1) e_1 \\ b_1 i_1 - \gamma_1 e_1 - \theta_1 u_1 \\ (\tilde{\varepsilon}_2 + d_2) a_2 - m_2 i_2 a_2 \\ (\varepsilon_2 + d_2 + m_2) i_2 - m_2 (i_2)^2 \\ (\gamma_3 + d_3) e_3 \\ b_3 i_3 - \gamma_3 e_3 \end{pmatrix} \quad (\text{A-3})$$

where  $l_1 = \frac{\sigma_1 \sigma_2}{\sigma_1 N_1 + \sigma_2 N_2}$  and  $l_3 = \frac{\sigma_3 \sigma_2}{\sigma_3 N_3 + \sigma_2 N_2}$ .

The corresponding Jacobian matrices at the disease free equilibrium of the above system are:

$$F_H^0 = \begin{pmatrix} 0 & 0 & l_1^0 \tilde{\beta}_{12} N_2^0 & l_1^0 \beta_{12} N_2^0 & 0 & 0 \\ 0 & 0 & 0 & 0 & 0 & 0 \\ 0 & (1 - \theta_2) l_1^0 \beta_{21} N_1^0 & 0 & 0 & 0 & (1 - \theta_2) l_3^0 \beta_{23} N_3^0 \\ 0 & \theta_2 l_1^0 \beta_{21} N_1^0 & 0 & 0 & 0 & \theta_2 l_3^0 \beta_{23} N_3^0 \\ 0 & 0 & l_3^0 \tilde{\beta}_{32} N_2^0 & l_3^0 \beta_{32} N_2^0 & 0 & 0 \\ 0 & 0 & 0 & 0 & 0 & 0 \end{pmatrix}, \quad (A-4)$$

$$V_H^0 = \begin{pmatrix} \gamma_1 + b_1 & 0 & 0 & 0 & 0 & 0 \\ \gamma_1 & b_1 & 0 & 0 & 0 & 0 \\ 0 & 0 & \tilde{\varepsilon}_2 + b_2 & 0 & 0 & 0 \\ 0 & 0 & 0 & \varepsilon_2 + b_2 + m_2 & 0 & 0 \\ 0 & 0 & 0 & 0 & \gamma_3 + b_3 & 0 \\ 0 & 0 & 0 & 0 & -\gamma_3 & b_3 \end{pmatrix}$$

where  $l_1^0 = \frac{\sigma_1 \sigma_2}{\sigma_1 N_1^0 + \sigma_2 N_2^0}$  and  $l_3^0 = \frac{\sigma_3 \sigma_2}{\sigma_3 N_3^0 + \sigma_2 N_2^0}$ .

The spectral radius of  $F_H^0 (V_H^0)^{-1}$  is given by:

$$R_{0,H} = \sqrt{\frac{(1 - \theta_2)(l_3^0)^2 \beta_{23} \tilde{\beta}_{32} \gamma_3 N_2^0 N_3^0}{b_3(\tilde{\varepsilon}_2 + b_2)(\gamma_3 + b_3)} + \frac{(1 - \theta_2)(l_1^0)^2 \beta_{21} \tilde{\beta}_{12} \gamma_1 N_1^0 N_2^0}{b_1(\tilde{\varepsilon}_2 + b_2)(\gamma_1 + b_1)} + \frac{\theta_2 (l_3^0)^2 \beta_{23} \beta_{32} \gamma_3 N_2^0 N_3^0}{b_3(\varepsilon_2 + b_2 + m_2)(\gamma_3 + b_3)} + \frac{\theta_2 (l_1^0)^2 \beta_{21} \beta_{12} \gamma_1 N_1^0 N_2^0}{b_1(\varepsilon_2 + b_2 + m_2)(\gamma_1 + b_1)}} \quad (A-5)$$

When strictly defined as the reproductive rate of the pathogen,  $R_0$  for the overall model that accounts for both vertical infection and horizontal transmission is given by:

$$R_0 = \frac{b_1 q_1}{2\mu_1} + \frac{1}{2} \sqrt{R_{0,V}^2 + 4R_{0,H}^2} \quad (A-6)$$

## A-2 Computation of the basic reproduction number in periodic environments

The concept behind the definition of  $R_0$  in a periodic environment as the spectral operator on space of periodic functions is described below, and for more details see [2, 3].

For all  $t \in \mathcal{R}$  and  $x \geq 0$ , let  $K(t, x)$  be a nonnegative  $n \times n$  matrix. Assume that  $K(t, x)$  is a periodic function of  $t$  of period  $\alpha$  for all  $x \geq 0$ . The idea behind the function  $K(t, x)$  is an epidemic model with  $n$  ‘‘infected’’ compartments  $(I_1, I_2, \dots, I_n)$ , which may be infectious or latent. The coefficient  $K_{i,j}(t, x)$  in row  $i$  and column  $j$  represents the expected number of individuals in compartment  $I_i$  that one individual in compartment  $I_j$  ‘‘generates’’ at the beginning of an epidemic per unit time at time  $t$  if it has been in compartment  $I_j$  for  $x$  units of time. The verb ‘generates’ cover the case where individuals in compartment  $I_j$  infect individuals in compartment  $I_i$ , but also the case where individuals in compartment  $I_j$  just move to compartment  $I_i$  [2].

By linearizing the system (1, 2, 3) near the disease-free equilibrium point

$$\left( \frac{b_1 N_1}{\theta_1}, 0, \frac{b_1 K_1}{d_1}, 0, 0, \frac{b_2 K_2}{d_2}, 0, 0, 0, \frac{b_3 N_3}{\theta_3}, \frac{b_3 K_3}{d_3}, 0, 0 \right)$$

we have:

$$\begin{aligned}
\dot{U}_1(t) &= b_{s1}(t)q_1I_1 - \theta_1U_1 \\
\dot{E}_1(t) &= \frac{\sigma_1\sigma_2\beta_{12}}{\sigma_1N_1 + \sigma_2N_2}I_2S_1^0 + \frac{\sigma_1\sigma_2\tilde{\beta}_{12}}{\sigma_1N_1 + \sigma_2N_2}A_2S_1^0 - (\gamma_1 - d_1\frac{N_1}{K_1})E_1 \\
\dot{I}_1(t) &= \gamma_1E_1 + \theta_1U_1 - d_1\frac{I_1N_1}{K_1}, \\
\dot{A}_2(t) &= (1 - \theta_2)\frac{\sigma_1\sigma_2\beta_{21}(t)}{\sigma_1N_1 + \sigma_2N_2}I_1S_2^0 + (1 - \theta_2)\frac{\sigma_3\sigma_2\beta_{23}(t)}{\sigma_3N_3 + \sigma_2N_2}I_3S_2^0 - (\tilde{\varepsilon}_2 - d_2\frac{N_2}{K_2})A_2 \\
\dot{I}_2(t) &= \theta_2\frac{\sigma_1\sigma_2\beta_{21}(t)}{\sigma_1N_1 + \sigma_2N_2}I_1S_2^0 + \theta_2\frac{\sigma_3\sigma_2\beta_{23}(t)}{\sigma_3N_3 + \sigma_2N_2}I_3S_2^0 - (\varepsilon_2 + m_2 + d_2\frac{N_2}{K_2})I_2 \\
\dot{E}_3(t) &= \frac{\sigma_3\sigma_2\beta_{32}}{\sigma_3N_3 + \sigma_2N_2}I_2S_3^0 + \frac{\sigma_3\sigma_2\beta_{32}}{\sigma_3N_2 + \sigma_2N_2}A_2S_3^0 - (\gamma_3 + d_3\frac{N_3}{K_3})E_3 \\
\dot{I}_3(t) &= \gamma_3E_3 - d_3\frac{I_3N_3}{K_3},
\end{aligned} \tag{A-7}$$

The transmissibility number  $\bar{R}_0$  is defined through the spectral radius of a linear integral operator on a space of periodic functions, thus the operator  $K(t, x)$  is given by:

$$\left( \begin{array}{ccccccc}
0 & 0 & b_1q_1e^{-\mu_1x} & 0 & 0 & 0 & 0 \\
0 & 0 & 0 & l_1^0\tilde{\beta}_{12}S_1^0e^{-v_1x} & l_1^0\beta_{12}S_1^0e^{-v_2x} & 0 & 0 \\
\theta_1e^{-\theta_1x} & \gamma_1e^{-v_3x} & 0 & 0 & 0 & 0 & 0 \\
0 & 0 & (1 - \theta_2)l_1^0\beta_{21}S_2^0e^{-\mu_1x} & 0 & 0 & 0 & (1 - \theta_2)l_3^0\beta_{23}S_2^0e^{-\mu_3x} \\
0 & 0 & \theta_2l_1^0\beta_{21}S_2^0e^{-\mu_1x} & 0 & 0 & 0 & \theta_2l_3^0\beta_{23}S_2^0e^{-\mu_3x} \\
0 & 0 & 0 & l_3^0\tilde{\beta}_{32}S_3^0e^{-v_1x} & l_3^0\beta_{32}S_3^0e^{-v_2x} & 0 & 0 \\
0 & 0 & 0 & 0 & 0 & \gamma_3e^{-v_4x} & 0
\end{array} \right) \tag{A-8}$$

where  $v_1 = (\tilde{\varepsilon}_2 + \mu_2)$ ,  $v_2 = (\tilde{\varepsilon}_2 + m_2 + \mu_2)$ ,  $v_3 = (\gamma_1 + \mu_1)$ ,  $v_4 = (\gamma_3 + \mu_3)$ . Thus the integral operator  $G_j$  gives:

$$\begin{aligned}
G_j &= \frac{b_1q_1}{\mu_1 + 2\pi ji} \bullet \frac{\theta_1}{\theta_1 + 2\pi ji} + \frac{\gamma_1}{\gamma_1 + \mu_1 + 2\pi ji} \bullet \frac{(l_1^0)^2\beta_{21}S_2^0S_1^0}{\mu_1 + 2\pi ji} \left[ \frac{(1 - \theta_2)\tilde{\beta}_{12}}{\tilde{\varepsilon}_2 + \mu_2 + 2\pi ji} + \frac{\theta_2\beta_{12}}{\varepsilon_2 + m_2 + \mu_2 + 2\pi ji} \right] \\
&+ \frac{\gamma_3}{\gamma_3 + \mu_3 + 2\pi ji} \bullet \frac{(l_3^0)^2\beta_{23}S_3^0S_2^0}{\mu_3 + 2\pi ji} \left[ \frac{(1 - \theta_2)\tilde{\beta}_{32}}{\tilde{\varepsilon}_2 + \mu_2 + 2\pi ji} + \frac{\theta_2\beta_{32}}{\varepsilon_2 + m_2 + \mu_2 + 2\pi ji} \right]
\end{aligned} \tag{A-9}$$

## References

1. van den Driessche P and Watmough J (2002) Reproduction numbers and sub-threshold endemic equilibria for compartmental models of disease transmission. *Math. Biosci.* 180(1): pp. 29-48.
2. Bacaer N (2007) Approximation of the basic reproduction number  $R_0$  for vector-Borne vieseases with a periodic vector population. *Bull. Math. Biol.* 69: 1067-1091.
3. Grassly NC and Fraser C (2006) Seasonal infectious disease epidemiology. *Proc. R. Soc.* 273: 2541-2550.
